METHODS AND RESULTS

Sensitivity analysis of microarray data

We performed 36 independent microarray experiments on PBLs of 18 subjects at baseline and following exposure to CPAP. Subject-specific gene expression changes in response to treatment were modest, with no single gene reaching statistical significance. We performed paired analysis (baseline vs. CPAP) for each subject using significance analysis of microarrays algorithm (SAM, paired option,  $n = 1,000$  random permutations) and adjusted for multiple hypothesis testing using false discovery rate analysis (FDR < 5%).<sup>1,2</sup> SAM performs a random permutation analysis between the subjects' expression profiles to determine a null distribution that is then used for FDR determination. We performed sensitivity analyses to assess whether gender, race, baseline BMI or baseline AHI contributed to global changes in gene expression following CPAP therapy (Table S1). For each analysis, the subjects were segregated into two groups based on categorical groupings (gender, race) or based on a median split for continuous variables (BMI, AHI). The BMI and AHI measured at the pre-CPAP research visit were used for this analysis. No genes reached statistical significance (at FDR < 5%) when the subjects were segregated by gender, race, BMI or AHI (Table S1).

Transcription factor analysis

The ~1,400 leading edge genes identified by GSEA included several transcription factors (TFs). Indeed, a number of the key "neoplasm" network hubs are TFs including JUN, MYC, and SMAD3 (Figure S1). However microarrays only measure gene expression, whereas many TFs are post-transcriptionally modified and/or are differentially expressed for only a short duration after stimulation. Therefore, we explored an alternative method for identifying enriched TFs as we have previously described.<sup>3,4</sup> For this approach, we leveraged the leading edge genes from our GSEA to statistically identify over-represented putative common binding site motifs of 332 mammalian TFs based on their position weight matrices. A window of 1,000 base pairs upstream and 200 base pairs downstream of each gene's transcription start site was searched for TF binding sites. We chose a Bonferroni-corrected P-value < 0.05 to designate significant enrichment for a given TF. We identified 7 TFs that were overrepresented among the leading edge genes identified by GSEA (Table S2). Most of these TFs were not leading edge genes themselves, which is not surprising given the fact that most TFs are regulated through post-translational modification.

**Table S1**—Impact of baseline characteristics on the gene expression response to CPAP.

| Covariate                | Group 1                   | Group 2           | Significant Genes |
|--------------------------|---------------------------|-------------------|-------------------|
| Gender                   | Male (n = 9)              | Female (n = 9)    | 0                 |
| Race                     | African-American (n = 11) | Caucasian (n = 7) | 0                 |
| BMI (kg/m <sup>2</sup> ) | < 39 (n = 9)              | > 39 (n = 9)      | 0                 |
| AHI (events/h)           | < 40 (n = 9)              | > 40 (n = 9)      | 0                 |

BMI, body mass index; AHI, apnea hypopnea index.

**Table S2**—Putative over-represented TFs among CPAP-responsive leading edge genes.

| Transcription Factor | Number of regulated genes | Adjusted P-value        |
|----------------------|---------------------------|-------------------------|
| E2F                  | 781                       | 3.86 × 10 <sup>-9</sup> |
| ETF                  | 558                       | 4.41 × 10 <sup>-6</sup> |
| NF-Y                 | 332                       | 5.47 × 10 <sup>-5</sup> |
| Nrf-1                | 405                       | 1.00 × 10 <sup>-3</sup> |
| FOXJ2                | 182                       | 3.00 × 10 <sup>-3</sup> |
| ZF5                  | 233                       | 2.30 × 10 <sup>-2</sup> |
| Pax-4                | 115                       | 4.90 × 10 <sup>-2</sup> |

However, one of the TFs, ETF, was a leading edge member. Several of the most enriched TFs have well-established roles in cancer biology, including E2F<sup>5</sup> and NF-Y.<sup>6</sup>

REFERENCES

1. Tusher VG, Tibshirani R, Chu G. Significance analysis of microarrays applied to the ionizing radiation response. *Proc Natl Acad Sci U S A* 2001;98:5116-21.
2. Storey JD, Tibshirani R. Statistical significance for genomewide studies. *Proc Natl Acad Sci U S A* 2003;100:9440-5.
3. Gharib SA, Liles WC, Matute-Bello G, Glenn RW, Martin TR, Altmeier WA. Computational identification of key biological modules and transcription factors in acute lung injury. *Am J Respir Crit Care Med* 2006;173:653-8.
4. Ulitsky I, Maron-Katz A, Shavit S, et al. Expander: from expression microarrays to networks and functions. *Nat Protoc* 2010;5:303-22.
5. Chen HZ, Tsai SY, Leone G. Emerging roles of E2Fs in cancer: an exit from cell cycle control. *Nature reviews. Cancer* 2009;9:785-97.
6. Dolfini D, Mantovani R. Targeting the Y/CCAAT box in cancer: YB-1 (YBX1) or NF-Y? *Cell death and differentiation* 2013;20:676-85.

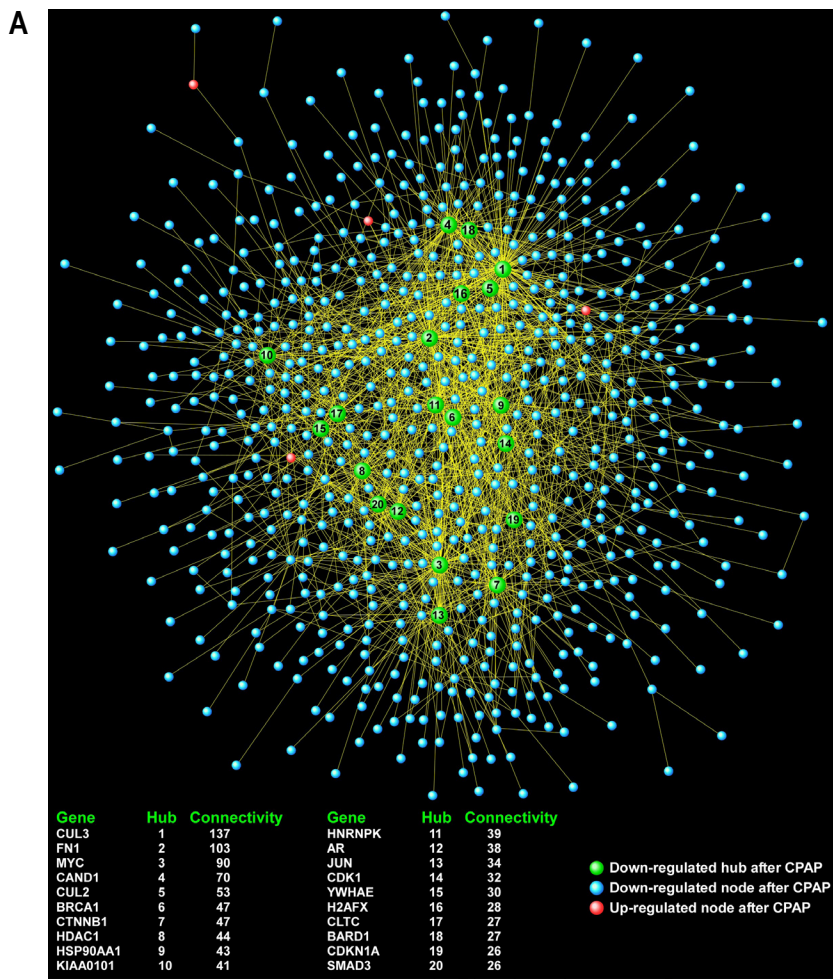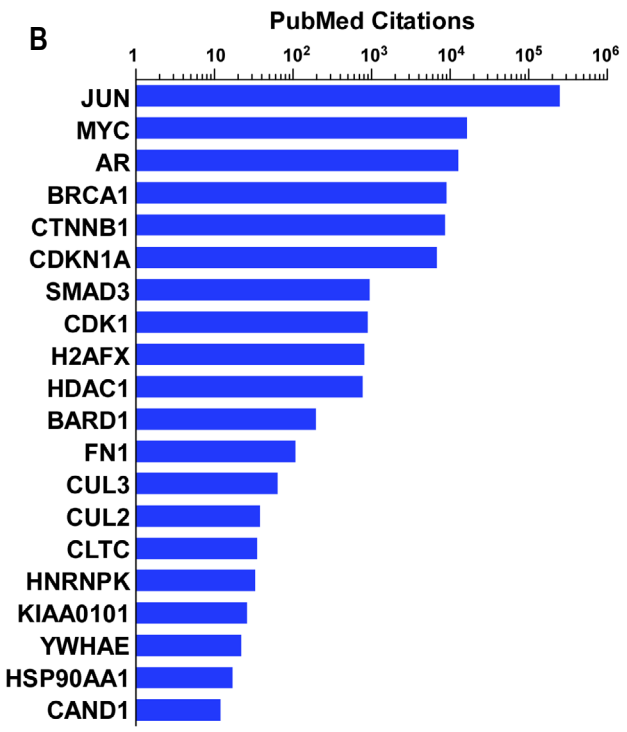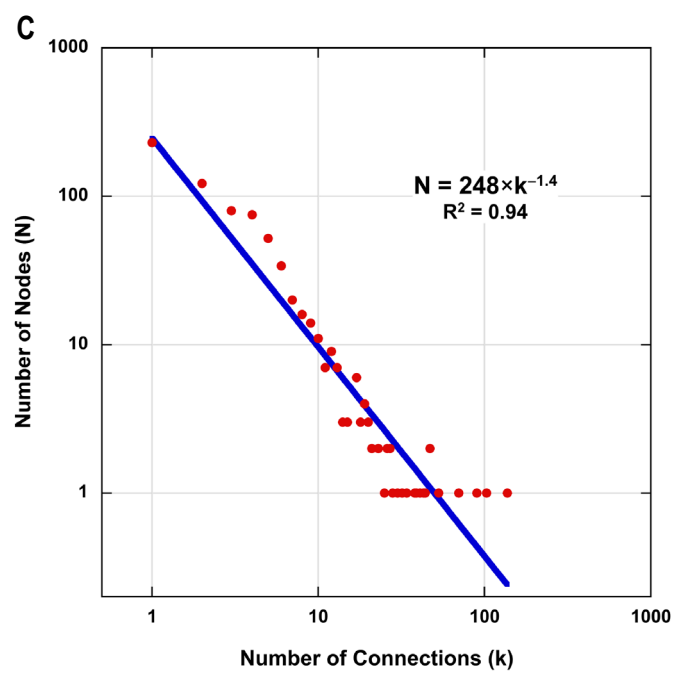

**Figure S1—(A)** Gene product interaction network of pathways mapping to neoplastic processes. This interactome was highlighted by a number of densely connected hubs (green, labeled 1-20). Note that the majority of the nodes had reduced expression after CPAP therapy (blue and green). **(B)** PubMed citation index of publications reporting the association of each network hub with the modifier term “cancer”. **(C)** Scale-free property of the neoplasm network is based on a power law relationship between nodal frequency distribution and connectivity.

**Table S3**—List of enriched gene sets (FDR < 0.05). Gene sets are hyperlinked for expanded details

| Gene Set                                                                                          | Number of Genes | P-value | FDR     | Gene Set                                                                      | Number of Genes | P-value | FDR   |
|---------------------------------------------------------------------------------------------------|-----------------|---------|---------|-------------------------------------------------------------------------------|-----------------|---------|-------|
| <a href="#">RAGHAVACHARI_PLATELET_SPECIFIC_GENES</a>                                              | 69              | > 0.001 | > 0.001 | <a href="#">GRAHAM_CML_QUIESCENT_VS_NORMAL_QUIESCENT_UP</a>                   | 84              | > 0.001 | 0.024 |
| <a href="#">HAHTOLA_SEZARY_SYNDROM_DN</a>                                                         | 39              | > 0.001 | > 0.001 | <a href="#">PYEON_HPV_POSITIVE_TUMORS_UP</a>                                  | 90              | > 0.001 | 0.03  |
| <a href="#">PUJANA_XPRSS_INT_NETWORK</a>                                                          | 167             | > 0.001 | 0.001   | <a href="#">BIOCARTA_CTCF_PATHWAY</a>                                         | 23              | 0.001   | 0.03  |
| <a href="#">CHAN_INTERFERON_PRODUCING_DENDRITIC_CELL</a>                                          | 12              | > 0.001 | 0.002   | <a href="#">SHEN_SMARCA2_TARGETS_UP</a>                                       | 417             | > 0.001 | 0.03  |
| <a href="#">PUJANA_BRCA_CENTERED_NETWORK</a>                                                      | 117             | > 0.001 | 0.003   | <a href="#">CHOW_RASSF1_TARGETS_UP</a>                                        | 27              | 0.001   | 0.03  |
| <a href="#">REACTOME_RNA_POL_I_PROMOTER_OPENING</a>                                               | 54              | > 0.001 | 0.004   | <a href="#">GENTLES_LEUKEMIC_STEM_CELL_DN</a>                                 | 19              | 0.001   | 0.03  |
| <a href="#">BIOCARTA_TOB1_PATHWAY</a>                                                             | 20              | > 0.001 | 0.006   | <a href="#">BIOCARTA_PTC1_PATHWAY</a>                                         | 11              | 0.001   | 0.03  |
| <a href="#">SCIBETTA_KDM5B_TARGETS_DN</a>                                                         | 78              | > 0.001 | 0.01    | <a href="#">BIOCARTA_EDG1_PATHWAY</a>                                         | 27              | > 0.001 | 0.03  |
| <a href="#">ZHENG_FOXP3_TARGETS_IN_THYMUS_UP</a>                                                  | 192             | > 0.001 | 0.011   | <a href="#">REACTOME_RNA_POL_I_TRANSCRIPTION</a>                              | 76              | > 0.001 | 0.03  |
| <a href="#">TANG_SENESCENCE_TP53_TARGETS_DN</a>                                                   | 56              | > 0.001 | 0.013   | <a href="#">BIOCARTA_STATHMIN_PATHWAY</a>                                     | 19              | 0.002   | 0.032 |
| <a href="#">NELSON_RESPONSE_TO_ANDROGEN_DN</a>                                                    | 19              | > 0.001 | 0.013   | <a href="#">REICHERT_MITOSIS_LIN9_TARGETS</a>                                 | 28              | 0.002   | 0.033 |
| <a href="#">PUJANA_BRCA2_PCC_NETWORK</a>                                                          | 416             | > 0.001 | 0.012   | <a href="#">GABRIELY_MIR21_TARGETS</a>                                        | 285             | > 0.001 | 0.032 |
| <a href="#">LY_AGING_OLD_DN</a>                                                                   | 56              | > 0.001 | 0.013   | <a href="#">REACTOME_MEIOSIS</a>                                              | 104             | > 0.001 | 0.032 |
| <a href="#">ZHANG_TLX_TARGETS_36HR_DN</a>                                                         | 184             | > 0.001 | 0.012   | <a href="#">GRAHAM_NORMAL_QUIESCENT_VS_NORMAL_DIVIDING_DN</a>                 | 84              | > 0.001 | 0.032 |
| <a href="#">ZHANG_BREAST_CANCER_PROGENITORS_UP</a>                                                | 417             | > 0.001 | 0.012   | <a href="#">REACTOME_CYCLIN_A_B1_ASSOCIATED_EVENTS_DURING_G2_M_TRANSITION</a> | 15              | 0.002   | 0.032 |
| <a href="#">REACTOME_MEIOTIC_SYNOPSIS</a>                                                         | 67              | > 0.001 | 0.015   | <a href="#">REACTOME_MEIOTIC_RECOMBINATION</a>                                | 77              | > 0.001 | 0.033 |
| <a href="#">REACTOME_PACKAGING_OF_TELOMERE_ENDS</a>                                               | 45              | > 0.001 | 0.015   | <a href="#">BIOCARTA_DREAM_PATHWAY</a>                                        | 14              | 0.003   | 0.033 |
| <a href="#">GRABARCZYK_BCL11B_TARGETS_UP</a>                                                      | 76              | > 0.001 | 0.015   | <a href="#">MISSIAGLIA_REGULATED_BY_METHYLATION_DN</a>                        | 116             | > 0.001 | 0.033 |
| <a href="#">BIOCARTA_AKAP95_PATHWAY</a>                                                           | 12              | > 0.001 | 0.017   | <a href="#">LY_AGING_MIDDLE_DN</a>                                            | 16              | 0.001   | 0.033 |
| <a href="#">WU_APOPTOSIS_BY_CDKN1A_VIA_TP53</a>                                                   | 55              | > 0.001 | 0.018   | <a href="#">MORI_PRE_BI_LYMPHOCYTE_UP</a>                                     | 78              | > 0.001 | 0.033 |
| <a href="#">REACTOME_AMYLOIDS</a>                                                                 | 73              | > 0.001 | 0.017   | <a href="#">ABRAMSON_INTERACT_WITH_AIRE</a>                                   | 43              | 0.001   | 0.033 |
| <a href="#">KONG_E2F3_TARGETS</a>                                                                 | 97              | > 0.001 | 0.017   | <a href="#">BIOCARTA_CTL_PATHWAY</a>                                          | 14              | 0.001   | 0.033 |
| <a href="#">REACTOME_IMMUNOREGULATORY_INTERACTIONS_BETWEEN_A_LYMPHOID_AND_A_NON_LYMPHOID_CELL</a> | 60              | > 0.001 | 0.016   | <a href="#">CROONQUIST_NRAS_SIGNALING_DN</a>                                  | 72              | > 0.001 | 0.034 |
| <a href="#">IKEDA_MIR1_TARGETS_DN</a>                                                             | 7               | > 0.001 | 0.016   | <a href="#">KEGG_CELL_CYCLE</a>                                               | 122             | > 0.001 | 0.034 |
| <a href="#">HAHTOLA_CTCL_PATHOGENESIS</a>                                                         | 16              | > 0.001 | 0.018   | <a href="#">REACTOME_PYRUVATE_METABOLISM_AND_CITRIC_ACID_TCA_CYCLE</a>        | 41              | > 0.001 | 0.034 |
| <a href="#">GREENBAUM_E2A_TARGETS_UP</a>                                                          | 33              | > 0.001 | 0.018   | <a href="#">ZHOU_CELL_CYCLE_GENES_IN_IR_RESPONSE_6HR</a>                      | 82              | > 0.001 | 0.034 |
| <a href="#">DEURIG_T_CELL_PROLYMPHOCYTIC_LEUKEMIA_DN</a>                                          | 311             | > 0.001 | 0.023   | <a href="#">KIM_GERMINAL_CENTER_T_HELPER_UP</a>                               | 65              | > 0.001 | 0.036 |
| <a href="#">LEE_EARLY_T_LYMPHOCYTE_UP</a>                                                         | 104             | > 0.001 | 0.023   | <a href="#">REACTOME_CELL_CYCLE</a>                                           | 392             | > 0.001 | 0.035 |
| <a href="#">MOREAUX_B_LYMPHOCYTE_MATURATION_BY_TACI_DN</a>                                        | 73              | > 0.001 | 0.023   | <a href="#">BROWNE_HCMV_INFECTION_20HR_DN</a>                                 | 100             | > 0.001 | 0.039 |
| <a href="#">BIDUS_METASTASIS_UP</a>                                                               | 213             | > 0.001 | 0.022   | <a href="#">ZHAN_MULTIPLE_MYELOMA_PR_UP</a>                                   | 44              | 0.001   | 0.038 |
| <a href="#">BIOCARTA_G2_PATHWAY</a>                                                               | 24              | > 0.001 | 0.023   | <a href="#">VANTVEER_BREAST_CANCER_METASTASIS_DN</a>                          | 117             | > 0.001 | 0.04  |
| <a href="#">MANN_RESPONSE_TO_AMIFOSTINE_DN</a>                                                    | 10              | 0.001   | 0.023   | <a href="#">RAMALHO_STEMNESS_UP</a>                                           | 201             | > 0.001 | 0.04  |
| <a href="#">CAIRO_PML_TARGETS_BOUND_BY_MYC_UP</a>                                                 | 23              | > 0.001 | 0.023   | <a href="#">MORI_IMMATURE_B_LYMPHOCYTE_DN</a>                                 | 89              | > 0.001 | 0.04  |
| <a href="#">REACTOME_G2_M_CHECKPOINTS</a>                                                         | 41              | > 0.001 | 0.024   | <a href="#">MATZUK_FERTILIZATION</a>                                          | 8               | 0.001   | 0.039 |
| <a href="#">MITSIADES_RESPONSE_TO_APLIDIN_DN</a>                                                  | 246             | > 0.001 | 0.023   | <a href="#">RUIZ_TNC_TARGETS_DN</a>                                           | 140             | > 0.001 | 0.042 |
| <a href="#">RHODES_UNDIFFERENTIATED_CANCER</a>                                                    | 68              | > 0.001 | 0.024   | <a href="#">REACTOME_MITOTIC_G2_G2_M_PHASES</a>                               | 77              | > 0.001 | 0.042 |
|                                                                                                   |                 |         |         | <a href="#">PUJANA_BREAST_CANCER_LIT_INT_NETWORK</a>                          | 100             | > 0.001 | 0.046 |
|                                                                                                   |                 |         |         | <a href="#">CROMER_METASTASIS_UP</a>                                          | 77              | > 0.001 | 0.047 |
|                                                                                                   |                 |         |         | <a href="#">ZHANG_TLX_TARGETS_60HR_DN</a>                                     | 276             | > 0.001 | 0.048 |

**Table S4**—Cancer-associated network genes.

| Gene Symbol | Gene Name                                                                            | Entrez Gene ID | Log <sub>2</sub> [postCPAP/preCPAP] |
|-------------|--------------------------------------------------------------------------------------|----------------|-------------------------------------|
| AARS        | alanyl-tRNA synthetase                                                               | 16             | -0.017                              |
| AASDHPPT    | aminoadipate-semialdehyde dehydrogenase-phosphopantetheinyl transferase              | 60496          | -0.028                              |
| ABCB1       | ATP-binding cassette, sub-family B (MDR/TAP), member 1                               | 5243           | -0.082                              |
| ACAT1       | acetyl-CoA acetyltransferase 1                                                       | 38             | -0.042                              |
| ACVR1B      | activin A receptor, type IB                                                          | 91             | -0.029                              |
| ADD3        | adducin 3 (gamma)                                                                    | 120            | -0.033                              |
| ADH1B       | alcohol dehydrogenase 1B (class I), beta polypeptide                                 | 125            | -0.063                              |
| AEBP2       | AE binding protein 2                                                                 | 121536         | -0.026                              |
| AHNAK       | AHNAK nucleoprotein                                                                  | 79026          | -0.044                              |
| AK4         | adenylate kinase 4                                                                   | 205            | -0.070                              |
| AKAP11      | A kinase (PRKA) anchor protein 11                                                    | 11215          | -0.030                              |
| AKR1C3      | aldo-keto reductase family 1, member C3                                              | 8644           | -0.106                              |
| AKT3        | v-akt murine thymoma viral oncogene homolog 3 (protein kinase B, gamma)              | 10000          | -0.053                              |
| AKTIP       | AKT interacting protein                                                              | 64400          | -0.037                              |
| ALCAM       | activated leukocyte cell adhesion molecule                                           | 214            | -0.039                              |
| ANAPC1      | anaphase promoting complex subunit 1                                                 | 64682          | -0.046                              |
| ANKRD28     | ankyrin repeat domain 28                                                             | 23243          | -0.084                              |
| ANKRD32     | ankyrin repeat domain 32                                                             | 84250          | -0.172                              |
| ANP32E      | acidic (leucine-rich) nuclear phosphoprotein 32 family, member E                     | 81611          | -0.051                              |
| APAF1       | apoptotic peptidase activating factor 1                                              | 317            | -0.025                              |
| AR          | androgen receptor                                                                    | 367            | -0.064                              |
| ARFGEF1     | ADP-ribosylation factor guanine nucleotide-exchange factor 1 (brefeldin A-inhibited) | 10565          | -0.022                              |
| ARFGEF2     | ADP-ribosylation factor guanine nucleotide-exchange factor 2 (brefeldin A-inhibited) | 10564          | -0.018                              |
| ARFIP1      | ADP-ribosylation factor interacting protein 1                                        | 27236          | -0.040                              |
| ARHGEF10    | Rho guanine nucleotide exchange factor (GEF) 10                                      | 9639           | -0.060                              |
| ARHGEF12    | Rho guanine nucleotide exchange factor (GEF) 12                                      | 23365          | -0.065                              |
| ARHGEF7     | Rho guanine nucleotide exchange factor (GEF) 7                                       | 8874           | -0.043                              |
| ARL6IP1     | ADP-ribosylation factor-like 6 interacting protein 1                                 | 23204          | -0.056                              |
| ARMC1       | armadillo repeat containing 1                                                        | 55156          | -0.074                              |
| ARMC8       | armadillo repeat containing 8                                                        | 25852          | -0.055                              |
| ARMCX3      | armadillo repeat containing, X-linked 3                                              | 51566          | -0.077                              |
| ARNT2       | aryl-hydrocarbon receptor nuclear translocator 2                                     | 9915           | -0.017                              |
| ASCC2       | activating signal cointegrator 1 complex subunit 2                                   | 84164          | -0.062                              |
| ASF1A       | ASF1 anti-silencing function 1 homolog A (S. cerevisiae)                             | 25842          | -0.090                              |
| ASPM        | asp (abnormal spindle) homolog, microcephaly associated (Drosophila)                 | 259266         | -0.076                              |
| ATAD2       | ATPase family, AAA domain containing 2                                               | 29028          | -0.019                              |
| ATF1        | activating transcription factor 1                                                    | 466            | -0.018                              |
| ATF2        | activating transcription factor 2                                                    | 1386           | -0.039                              |
| ATG16L1     | autophagy related 16-like 1 (S. cerevisiae)                                          | 55054          | -0.027                              |
| ATM         | ataxia telangiectasia mutated                                                        | 472            | -0.044                              |
| ATP2B4      | ATPase, Ca <sup>++</sup> transporting, plasma membrane 4                             | 493            | -0.050                              |
| ATR         | ataxia telangiectasia and Rad3 related                                               | 545            | -0.046                              |
| ATRX        | alpha thalassemia/mental retardation syndrome X-linked                               | 546            | -0.117                              |

Table S4 continues on the following page

**Table S4** (continued)—Cancer-associated network genes.

| Gene Symbol | Gene Name                                              | Entrez Gene ID | Log <sub>2</sub> [postCPAP/preCPAP] |
|-------------|--------------------------------------------------------|----------------|-------------------------------------|
| AURKA       | aurora kinase A                                        | 6790           | -0.056                              |
| AZI2        | 5-azacytidine induced 2                                | 64343          | -0.016                              |
| BARD1       | BRCA1 associated RING domain 1                         | 580            | -0.049                              |
| BAX         | BCL2-associated X protein                              | 581            | -0.028                              |
| BCAS2       | breast carcinoma amplified sequence 2                  | 10286          | -0.077                              |
| BCCIP       | BRCA2 and CDKN1A interacting protein                   | 56647          | -0.041                              |
| BCLAF1      | BCL2-associated transcription factor 1                 | 9774           | -0.031                              |
| BIRC2       | baculoviral IAP repeat containing 2                    | 329            | -0.023                              |
| BLM         | Bloom syndrome, RecQ helicase-like                     | 641            | -0.030                              |
| BLMH        | bleomycin hydrolase                                    | 642            | -0.056                              |
| BMI1        | BMI1 polycomb ring finger oncogene                     | 648            | -0.036                              |
| BNIP3       | BCL2/adenovirus E1B 19kDa interacting protein 3        | 664            | -0.045                              |
| BPTF        | bromodomain PHD finger transcription factor            | 2186           | -0.035                              |
| BRCA1       | breast cancer 1, early onset                           | 672            | -0.043                              |
| BRD7        | bromodomain containing 7                               | 29117          | -0.018                              |
| C11orf30    | chromosome 11 open reading frame 30                    | 56946          | -0.042                              |
| CA2         | carbonic anhydrase II                                  | 760            | -0.119                              |
| CALD1       | caldesmon 1                                            | 800            | -0.101                              |
| CALM1       | calmodulin 1 (phosphorylase kinase, delta)             | 801            | -0.051                              |
| CAND1       | cullin-associated and neddylation-dissociated 1        | 55832          | -0.058                              |
| CAPN2       | calpain 2, (m/II) large subunit                        | 824            | -0.053                              |
| CAPRN1      | cell cycle associated protein 1                        | 4076           | -0.033                              |
| CASP8AP2    | caspase 8 associated protein 2                         | 9994           | -0.044                              |
| CAV2        | caveolin 2                                             | 858            | -0.050                              |
| CBFB        | core-binding factor, beta subunit                      | 865            | -0.024                              |
| CBLL1       | Cbl proto-oncogene, E3 ubiquitin protein ligase-like 1 | 79872          | -0.017                              |
| CBX3        | chromobox homolog 3                                    | 11335          | -0.023                              |
| CCL4        | chemokine (C-C motif) ligand 4                         | 6351           | -0.070                              |
| CCL5        | chemokine (C-C motif) ligand 5                         | 6352           | -0.105                              |
| CCNA1       | cyclin A1                                              | 8900           | -0.104                              |
| CCNB1       | cyclin B1                                              | 891            | -0.116                              |
| CCND2       | cyclin D2                                              | 894            | -0.054                              |
| CCND3       | cyclin D3                                              | 896            | -0.019                              |
| CCT6A       | chaperonin containing TCP1, subunit 6A (zeta 1)        | 908            | -0.039                              |
| CD160       | CD160 molecule                                         | 11126          | -0.029                              |
| CD2         | CD2 molecule                                           | 914            | -0.086                              |
| CD244       | CD244 molecule, natural killer cell receptor 2B4       | 51744          | -0.044                              |
| CD247       | CD247 molecule                                         | 919            | -0.098                              |
| CD28        | CD28 molecule                                          | 940            | -0.062                              |
| CD2AP       | CD2-associated protein                                 | 23607          | -0.022                              |
| CD38        | CD38 molecule                                          | 952            | -0.094                              |
| CD3E        | CD3e molecule, epsilon (CD3-TCR complex)               | 916            | -0.037                              |
| CD47        | CD47 molecule                                          | 961            | -0.037                              |

Table S4 continues on the following page

**Table S4** (continued)—Cancer-associated network genes.

| Gene Symbol | Gene Name                                              | Entrez Gene ID | Log <sub>2</sub> [postCPAP/preCPAP] |
|-------------|--------------------------------------------------------|----------------|-------------------------------------|
| CD52        | CD52 molecule                                          | 1043           | -0.054                              |
| CD9         | CD9 molecule                                           | 928            | -0.058                              |
| CDC25A      | cell division cycle 25A                                | 993            | -0.045                              |
| CDC40       | cell division cycle 40                                 | 51362          | -0.027                              |
| CDC45       | cell division cycle 45                                 | 8318           | -0.020                              |
| CDK1        | cyclin-dependent kinase 1                              | 983            | -0.084                              |
| CDK3        | cyclin-dependent kinase 3                              | 1018           | -0.024                              |
| CDK8        | cyclin-dependent kinase 8                              | 1024           | -0.058                              |
| CDKN1A      | cyclin-dependent kinase inhibitor 1A (p21, Cip1)       | 1026           | -0.042                              |
| CDKN2AIP    | CDKN2A interacting protein                             | 55602          | -0.033                              |
| CDKN3       | cyclin-dependent kinase inhibitor 3                    | 1033           | -0.034                              |
| CDYL        | chromodomain protein, Y-like                           | 9425           | -0.026                              |
| CEBPG       | CCAAT/enhancer binding protein (C/EBP), gamma          | 1054           | -0.024                              |
| CENPC1      | centromere protein C 1                                 | 1060           | -0.113                              |
| CENPJ       | centromere protein J                                   | 55835          | -0.065                              |
| CENPK       | centromere protein K                                   | 64105          | -0.112                              |
| CENPN       | centromere protein N                                   | 55839          | 0.014                               |
| CEP192      | centrosomal protein 192kDa                             | 55125          | -0.046                              |
| CEP350      | centrosomal protein 350kDa                             | 9857           | -0.018                              |
| CEP57       | centrosomal protein 57kDa                              | 9702           | -0.057                              |
| CEP97       | centrosomal protein 97kDa                              | 79598          | -0.043                              |
| CHEK1       | checkpoint kinase 1                                    | 1111           | -0.079                              |
| CHEK2       | checkpoint kinase 2                                    | 11200          | -0.154                              |
| CHN1        | chimerin 1                                             | 1123           | -0.107                              |
| CHTOP       | chromatin target of PRMT1                              | 26097          | -0.010                              |
| CKAP5       | cytoskeleton associated protein 5                      | 9793           | -0.043                              |
| CKS1B       | CDC28 protein kinase regulatory subunit 1B             | 1163           | -0.034                              |
| CLGN        | calmegin                                               | 1047           | -0.032                              |
| CLOCK       | clock circadian regulator                              | 9575           | -0.028                              |
| CLSPN       | claspin                                                | 63967          | -0.060                              |
| CLTC        | clathrin, heavy chain (Hc)                             | 1213           | -0.021                              |
| CMPK1       | cytidine monophosphate (UMP-CMP) kinase 1, cytosolic   | 51727          | -0.047                              |
| CNN3        | calponin 3, acidic                                     | 1266           | -0.050                              |
| CNOT7       | CCR4-NOT transcription complex, subunit 7              | 29883          | -0.033                              |
| COL4A5      | collagen, type IV, alpha 5                             | 1287           | -0.049                              |
| COPS2       | COP9 signalosome subunit 2                             | 9318           | -0.034                              |
| COPS8       | COP9 signalosome subunit 8                             | 10920          | -0.035                              |
| CPA3        | carboxypeptidase A3 (mast cell)                        | 1359           | -0.121                              |
| CPSF4       | cleavage and polyadenylation specific factor 4, 30kDa  | 10898          | -0.027                              |
| CPSF6       | cleavage and polyadenylation specific factor 6, 68kDa  | 11052          | -0.034                              |
| CRKL        | v-crk sarcoma virus CT10 oncogene homolog (avian)-like | 1399           | -0.029                              |
| CRY1        | cryptochrome 1 (photolyase-like)                       | 1407           | -0.042                              |
| CRYZ        | crystallin, zeta (quinone reductase)                   | 1429           | -0.065                              |

Table S4 continues on the following page

**Table S4** (continued)—Cancer-associated network genes.

| Gene Symbol | Gene Name                                                               | Entrez Gene ID | Log <sub>2</sub> [postCPAP/preCPAP] |
|-------------|-------------------------------------------------------------------------|----------------|-------------------------------------|
| CSE1L       | CSE1 chromosome segregation 1-like (yeast)                              | 1434           | -0.048                              |
| CSTF2       | cleavage stimulation factor, 3' pre-RNA, subunit 2, 64kDa               | 1478           | -0.051                              |
| CSTF3       | cleavage stimulation factor, 3' pre-RNA, subunit 3, 77kDa               | 1479           | -0.054                              |
| CTBP1       | C-terminal binding protein 1                                            | 1487           | -0.042                              |
| CTLA4       | cytotoxic T-lymphocyte-associated protein 4                             | 1493           | -0.083                              |
| CTNNB1      | catenin (cadherin-associated protein), beta 1, 88kDa                    | 1499           | -0.025                              |
| CTPS1       | CTP synthase 1                                                          | 1503           | -0.046                              |
| CTSL1       | cathepsin L1                                                            | 1514           | -0.068                              |
| CUL2        | cullin 2                                                                | 8453           | -0.059                              |
| CUL3        | cullin 3                                                                | 8452           | -0.033                              |
| CXCR4       | chemokine (C-X-C motif) receptor 4                                      | 7852           | -0.034                              |
| CYB5A       | cytochrome b5 type A (microsomal)                                       | 1528           | -0.055                              |
| CYP2J2      | cytochrome P450, family 2, subfamily J, polypeptide 2                   | 1573           | -0.034                              |
| DBF4        | DBF4 homolog (S. cerevisiae)                                            | 10926          | -0.095                              |
| DCAF6       | DDB1 and CUL4 associated factor 6                                       | 55827          | -0.020                              |
| DCK         | deoxycytidine kinase                                                    | 1633           | -0.030                              |
| DDB2        | damage-specific DNA binding protein 2, 48kDa                            | 1643           | -0.050                              |
| DDR2        | discoidin domain receptor tyrosine kinase 2                             | 4921           | -0.046                              |
| DDX1        | DEAD (Asp-Glu-Ala-Asp) box helicase 1                                   | 1653           | -0.033                              |
| DDX21       | DEAD (Asp-Glu-Ala-Asp) box helicase 21                                  | 9188           | -0.039                              |
| DDX39A      | DEAD (Asp-Glu-Ala-Asp) box polypeptide 39A                              | 10212          | -0.056                              |
| DEPTOR      | DEP domain containing MTOR-interacting protein                          | 64798          | -0.055                              |
| DHX9        | DEAH (Asp-Glu-Ala-His) box polypeptide 9                                | 1660           | -0.031                              |
| DLAT        | dihydrolipoamide S-acetyltransferase                                    | 1737           | -0.015                              |
| DLGAP5      | discs, large (Drosophila) homolog-associated protein 5                  | 9787           | -0.080                              |
| DMD         | dystrophin                                                              | 1756           | -0.019                              |
| DNAJC9      | DnaJ (Hsp40) homolog, subfamily C, member 9                             | 23234          | -0.051                              |
| DNTT        | deoxynucleotidyltransferase, terminal                                   | 1791           | -0.026                              |
| DPM1        | dolichyl-phosphate mannosyltransferase polypeptide 1, catalytic subunit | 8813           | -0.040                              |
| DPY30       | dpy-30 homolog (C. elegans)                                             | 84661          | -0.056                              |
| DROSHA      | drosha, ribonuclease type III                                           | 29102          | -0.031                              |
| DSC1        | desmocollin 1                                                           | 1823           | -0.054                              |
| DUSP11      | dual specificity phosphatase 11 (RNA/RNP complex 1-interacting)         | 8446           | -0.014                              |
| DUT         | deoxyuridine triphosphatase                                             | 1854           | -0.057                              |
| DYRK1A      | dual-specificity tyrosine-(Y)-phosphorylation regulated kinase 1A       | 1859           | -0.020                              |
| EAPP        | E2F-associated phosphoprotein                                           | 55837          | -0.036                              |
| ECT2        | epithelial cell transforming sequence 2 oncogene                        | 1894           | -0.064                              |
| EFTUD2      | elongation factor Tu GTP binding domain containing 2                    | 9343           | 0.020                               |
| EIF2S1      | eukaryotic translation initiation factor 2, subunit 1 alpha, 35kDa      | 1965           | -0.032                              |
| EIF3H       | eukaryotic translation initiation factor 3, subunit H                   | 8667           | -0.027                              |
| EIF4A3      | eukaryotic translation initiation factor 4A3                            | 9775           | -0.023                              |
| EIF4B       | eukaryotic translation initiation factor 4B                             | 1975           | -0.035                              |
| EIF5        | eukaryotic translation initiation factor 5                              | 1983           | -0.045                              |

Table S4 continues on the following page

**Table S4** (continued)—Cancer-associated network genes.

| Gene Symbol | Gene Name                                                                                  | Entrez Gene ID | Log <sub>2</sub> [postCPAP/preCPAP] |
|-------------|--------------------------------------------------------------------------------------------|----------------|-------------------------------------|
| EIF5B       | eukaryotic translation initiation factor 5B                                                | 9669           | -0.030                              |
| EPHA4       | EPH receptor A4                                                                            | 2043           | -0.047                              |
| EPRS        | glutamyl-prolyl-tRNA synthetase                                                            | 2058           | -0.045                              |
| ERCC3       | excision repair cross-complementing rodent repair deficiency, complementation group 3      | 2071           | -0.016                              |
| ERCC6L      | excision repair cross-complementing rodent repair deficiency, complementation group 6-like | 54821          | -0.048                              |
| ESCO2       | establishment of cohesion 1 homolog 2 ( <i>S. cerevisiae</i> )                             | 157570         | -0.052                              |
| ESPL1       | extra spindle pole bodies homolog 1 ( <i>S. cerevisiae</i> )                               | 9700           | -0.036                              |
| ESYT2       | extended synaptotagmin-like protein 2                                                      | 57488          | -0.028                              |
| EZH2        | enhancer of zeste homolog 2 ( <i>Drosophila</i> )                                          | 2146           | -0.079                              |
| F2R         | coagulation factor II (thrombin) receptor                                                  | 2149           | -0.035                              |
| FAM13B      | family with sequence similarity 13, member B                                               | 51306          | -0.026                              |
| FAM208B     | family with sequence similarity 208, member B                                              | 54906          | -0.025                              |
| FANCD2      | Fanconi anemia, complementation group D2                                                   | 2177           | -0.035                              |
| FANCG       | Fanconi anemia, complementation group G                                                    | 2189           | -0.022                              |
| FANCL       | Fanconi anemia, complementation group L                                                    | 55120          | -0.061                              |
| FASTKD2     | FAST kinase domains 2                                                                      | 22868          | -0.045                              |
| FBL         | fibrillarin                                                                                | 2091           | -0.030                              |
| FBXO11      | F-box protein 11                                                                           | 80204          | -0.017                              |
| FBXO28      | F-box protein 28                                                                           | 23219          | -0.035                              |
| FBXO3       | F-box protein 3                                                                            | 26273          | -0.039                              |
| FBXO5       | F-box protein 5                                                                            | 26271          | -0.046                              |
| FBXW11      | F-box and WD repeat domain containing 11                                                   | 23291          | -0.026                              |
| FEM1A       | fem-1 homolog a ( <i>C. elegans</i> )                                                      | 55527          | -0.040                              |
| FEM1B       | fem-1 homolog b ( <i>C. elegans</i> )                                                      | 10116          | -0.025                              |
| FEN1        | flap structure-specific endonuclease 1                                                     | 2237           | -0.024                              |
| FGFR10P     | FGFR1 oncogene partner                                                                     | 11116          | -0.008                              |
| FH          | fumarate hydratase                                                                         | 2271           | -0.057                              |
| FN1         | fibronectin 1                                                                              | 2335           | -0.057                              |
| FNBP1       | formin binding protein 1                                                                   | 23048          | -0.015                              |
| FUBP1       | far upstream element (FUSE) binding protein 1                                              | 8880           | -0.030                              |
| FYN         | FYN oncogene related to SRC, FGR, YES                                                      | 2534           | -0.048                              |
| G3BP1       | GTPase activating protein (SH3 domain) binding protein 1                                   | 10146          | -0.037                              |
| G3BP2       | GTPase activating protein (SH3 domain) binding protein 2                                   | 9908           | -0.066                              |
| GABPB2      | GA binding protein transcription factor, beta subunit 2                                    | 126626         | -0.033                              |
| GALE        | UDP-galactose-4-epimerase                                                                  | 2582           | -0.029                              |
| GANAB       | glucosidase, alpha; neutral AB                                                             | 23193          | -0.046                              |
| GCLM        | glutamate-cysteine ligase, modifier subunit                                                | 2730           | -0.047                              |
| GCN1L1      | GCN1 general control of amino-acid synthesis 1-like 1 (yeast)                              | 10985          | -0.045                              |
| GIN1        | gypsy retrotransposon integrase 1                                                          | 54826          | -0.049                              |
| GINS1       | GINS complex subunit 1 (Psf1 homolog)                                                      | 9837           | -0.132                              |
| GINS2       | GINS complex subunit 2 (Psf2 homolog)                                                      | 51659          | -0.031                              |
| GINS3       | GINS complex subunit 3 (Psf3 homolog)                                                      | 64785          | -0.091                              |
| GLCCI1      | glucocorticoid induced transcript 1                                                        | 113263         | -0.018                              |

Table S4 continues on the following page



**Table S4** (continued)—Cancer-associated network genes.

| Gene Symbol | Gene Name                                                                    | Entrez Gene ID | Log <sub>2</sub> [postCPAP/preCPAP] |
|-------------|------------------------------------------------------------------------------|----------------|-------------------------------------|
| GLS2        | glutaminase 2 (liver, mitochondrial)                                         | 27165          | -0.023                              |
| GMPS        | guanine monphosphate synthetase                                              | 8833           | -0.018                              |
| GNAQ        | guanine nucleotide binding protein (G protein), q polypeptide                | 2776           | -0.046                              |
| GNB5        | guanine nucleotide binding protein (G protein), beta 5                       | 10681          | -0.060                              |
| GNG11       | guanine nucleotide binding protein (G protein), gamma 11                     | 2791           | -0.090                              |
| GPR137B     | G protein-coupled receptor 137B                                              | 7107           | -0.071                              |
| GPR56       | G protein-coupled receptor 56                                                | 9289           | -0.115                              |
| GRAP2       | GRB2-related adaptor protein 2                                               | 9402           | -0.093                              |
| GTF2A1      | general transcription factor IIA, 1, 19/37kDa                                | 2957           | -0.015                              |
| GTF3C3      | general transcription factor IIIC, polypeptide 3, 102kDa                     | 9330           | -0.027                              |
| GTPBP10     | GTP-binding protein 10 (putative)                                            | 85865          | -0.046                              |
| GZMA        | granzyme A (granzyme 1, cytotoxic T-lymphocyte-associated serine esterase 3) | 3001           | -0.102                              |
| GZMB        | granzyme B (granzyme 2, cytotoxic T-lymphocyte-associated serine esterase 1) | 3002           | -0.147                              |
| GZMK        | granzyme K (granzyme 3; tryptase II)                                         | 3003           | -0.096                              |
| H2AFX       | H2A histone family, member X                                                 | 3014           | -0.067                              |
| HACE1       | HECT domain and ankyrin repeat containing E3 ubiquitin protein ligase 1      | 57531          | -0.060                              |
| HAPLN1      | hyaluronan and proteoglycan link protein 1                                   | 1404           | -0.033                              |
| HAT1        | histone acetyltransferase 1                                                  | 8520           | -0.054                              |
| HBS1L       | HBS1-like ( <i>S. cerevisiae</i> )                                           | 10767          | -0.047                              |
| HDAC1       | histone deacetylase 1                                                        | 3065           | -0.036                              |
| HEATR1      | HEAT repeat containing 1                                                     | 55127          | -0.040                              |
| HECTD1      | HECT domain containing E3 ubiquitin protein ligase 1                         | 25831          | -0.029                              |
| HELLS       | helicase, lymphoid-specific                                                  | 3070           | -0.028                              |
| HERC2       | HECT and RLD domain containing E3 ubiquitin protein ligase 2                 | 8924           | -0.046                              |
| HIBCH       | 3-hydroxyisobutyryl-CoA hydrolase                                            | 26275          | -0.032                              |
| HIPK1       | homeodomain interacting protein kinase 1                                     | 204851         | -0.037                              |
| HLTF        | helicase-like transcription factor                                           | 6596           | -0.053                              |
| HMGB1       | high mobility group box 1                                                    | 3146           | -0.038                              |
| HMGB3       | high mobility group box 3                                                    | 3149           | -0.036                              |
| HNMT        | histamine N-methyltransferase                                                | 3176           | -0.036                              |
| HNRNPA1     | heterogeneous nuclear ribonucleoprotein A1                                   | 3178           | -0.096                              |
| HNRNPA3     | heterogeneous nuclear ribonucleoprotein A3                                   | 220988         | -0.019                              |
| HNRNPAB     | heterogeneous nuclear ribonucleoprotein A/B                                  | 3182           | -0.037                              |
| HNRNPH3     | heterogeneous nuclear ribonucleoprotein H3 (2H9)                             | 3189           | -0.032                              |
| HNRNPK      | heterogeneous nuclear ribonucleoprotein K                                    | 3190           | -0.044                              |
| HNRNPR      | heterogeneous nuclear ribonucleoprotein R                                    | 10236          | -0.020                              |
| HNRNPU      | heterogeneous nuclear ribonucleoprotein U (scaffold attachment factor A)     | 3192           | -0.033                              |
| HNRPDL      | heterogeneous nuclear ribonucleoprotein D-like                               | 9987           | -0.021                              |
| HOXA9       | homeobox A9                                                                  | 3205           | -0.038                              |
| HPRT1       | hypoxanthine phosphoribosyltransferase 1                                     | 3251           | -0.053                              |
| HSP90AA1    | heat shock protein 90kDa alpha (cytosolic), class A member 1                 | 3320           | -0.066                              |
| HUWE1       | HECT, UBA and WWE domain containing 1, E3 ubiquitin protein ligase           | 10075          | -0.020                              |
| ICOS        | inducible T-cell co-stimulator                                               | 29851          | -0.092                              |

Table S4 continues on the following page

**Table S4** (continued)—Cancer-associated network genes.

| Gene Symbol | Gene Name                                                                                        | Entrez Gene ID | Log <sub>2</sub> [postCPAP/preCPAP] |
|-------------|--------------------------------------------------------------------------------------------------|----------------|-------------------------------------|
| ID2         | inhibitor of DNA binding 2, dominant negative helix-loop-helix protein                           | 3398           | -0.066                              |
| IDE         | insulin-degrading enzyme                                                                         | 3416           | -0.031                              |
| IGFBP5      | insulin-like growth factor binding protein 5                                                     | 3488           | -0.045                              |
| IK          | IK cytokine, down-regulator of HLA II                                                            | 3550           | -0.029                              |
| IKBKAP      | inhibitor of kappa light polypeptide gene enhancer in B-cells, kinase complex-associated protein | 8518           | -0.027                              |
| IKZF2       | IKAROS family zinc finger 2 (Helios)                                                             | 22807          | -0.029                              |
| IKZF3       | IKAROS family zinc finger 3 (Aiolos)                                                             | 22806          | -0.055                              |
| IL12RB2     | interleukin 12 receptor, beta 2                                                                  | 3595           | -0.084                              |
| IL18R1      | interleukin 18 receptor 1                                                                        | 8809           | -0.094                              |
| IL23A       | interleukin 23, alpha subunit p19                                                                | 51561          | -0.029                              |
| IL2RB       | interleukin 2 receptor, beta                                                                     | 3560           | -0.064                              |
| IL7R        | interleukin 7 receptor                                                                           | 3575           | -0.077                              |
| INSIG1      | insulin induced gene 1                                                                           | 3638           | -0.099                              |
| INTS6       | integrator complex subunit 6                                                                     | 26512          | -0.036                              |
| INTS7       | integrator complex subunit 7                                                                     | 25896          | -0.066                              |
| IPO5        | importin 5                                                                                       | 3843           | -0.048                              |
| IPO8        | importin 8                                                                                       | 10526          | -0.028                              |
| ITFG1       | integrin alpha FG-GAP repeat containing 1                                                        | 81533          | -0.051                              |
| ITGA6       | integrin, alpha 6                                                                                | 3655           | -0.057                              |
| ITGB3BP     | integrin beta 3 binding protein (beta3-endonexin)                                                | 23421          | -0.107                              |
| ITGB4       | integrin, beta 4                                                                                 | 3691           | -0.050                              |
| IVNS1ABP    | influenza virus NS1A binding protein                                                             | 10625          | -0.038                              |
| JAK1        | Janus kinase 1                                                                                   | 3716           | -0.022                              |
| JUN         | jun proto-oncogene                                                                               | 3725           | -0.058                              |
| KANK1       | KN motif and ankyrin repeat domains 1                                                            | 23189          | -0.024                              |
| KAT2B       | K(lysine) acetyltransferase 2B                                                                   | 8850           | -0.036                              |
| KBTBD7      | kelch repeat and BTB (POZ) domain containing 7                                                   | 84078          | -0.043                              |
| KCTD15      | potassium channel tetramerisation domain containing 15                                           | 79047          | -0.043                              |
| KDM1A       | lysine (K)-specific demethylase 1A                                                               | 23028          | -0.014                              |
| KIAA0101    | KIAA0101                                                                                         | 9768           | -0.100                              |
| KIAA1109    | KIAA1109                                                                                         | 84162          | -0.022                              |
| KIAA1279    | KIAA1279                                                                                         | 26128          | -0.034                              |
| KIAA1430    | KIAA1430                                                                                         | 57587          | -0.064                              |
| KIDINS220   | kinase D-interacting substrate, 220kDa                                                           | 57498          | -0.015                              |
| KIF11       | kinesin family member 11                                                                         | 3832           | -0.089                              |
| KIF14       | kinesin family member 14                                                                         | 9928           | -0.069                              |
| KIF21A      | kinesin family member 21A                                                                        | 55605          | -0.074                              |
| KIF21B      | kinesin family member 21B                                                                        | 23046          | -0.032                              |
| KIF2C       | kinesin family member 2C                                                                         | 11004          | -0.074                              |
| KIFAP3      | kinesin-associated protein 3                                                                     | 22920          | -0.069                              |
| KIR2DS4     | killer cell immunoglobulin-like receptor, two domains, short cytoplasmic tail, 4                 | 100132285      | -0.166                              |
| KIR3DL2     | killer cell immunoglobulin-like receptor, three domains, long cytoplasmic tail, 2                | 3812           | -0.103                              |
| KLHDC2      | kelch domain containing 2                                                                        | 23588          | -0.025                              |

Table S4 continues on the following page

**Table S4** (continued)—Cancer-associated network genes.

| Gene Symbol | Gene Name                                                       | Entrez Gene ID | Log <sub>2</sub> [postCPAP/preCPAP] |
|-------------|-----------------------------------------------------------------|----------------|-------------------------------------|
| KLHL23      | kelch-like family member 23                                     | 151230         | -0.029                              |
| KLHL24      | kelch-like family member 24                                     | 54800          | -0.028                              |
| KLHL8       | kelch-like family member 8                                      | 57563          | -0.047                              |
| KNTC1       | kinetochore associated 1                                        | 9735           | -0.069                              |
| KTN1        | kinectin 1 (kinesin receptor)                                   | 3895           | -0.032                              |
| LANCL1      | LanC lantibiotic synthetase component C-like 1 (bacterial)      | 10314          | -0.050                              |
| LARP4       | La ribonucleoprotein domain family, member 4                    | 113251         | -0.028                              |
| LARP7       | La ribonucleoprotein domain family, member 7                    | 51574          | -0.031                              |
| LATS1       | LATS, large tumor suppressor, homolog 1 (Drosophila)            | 9113           | -0.011                              |
| LBR         | lamin B receptor                                                | 3930           | -0.078                              |
| LCK         | lymphocyte-specific protein tyrosine kinase                     | 3932           | -0.043                              |
| LEF1        | lymphoid enhancer-binding factor 1                              | 51176          | -0.050                              |
| LPIN1       | lipin 1                                                         | 23175          | -0.028                              |
| LRBA        | LPS-responsive vesicle trafficking, beach and anchor containing | 987            | -0.072                              |
| LUC7L3      | LUC7-like 3 ( <i>S. cerevisiae</i> )                            | 51747          | -0.047                              |
| LUZP1       | leucine zipper protein 1                                        | 7798           | -0.021                              |
| MAGED2      | melanoma antigen family D, 2                                    | 10916          | -0.061                              |
| MAN2A1      | mannosidase, alpha, class 2A, member 1                          | 4124           | -0.059                              |
| MAP3K5      | mitogen-activated protein kinase kinase kinase 5                | 4217           | -0.029                              |
| MAP4K5      | mitogen-activated protein kinase kinase kinase kinase 5         | 11183          | -0.043                              |
| MAPRE1      | microtubule-associated protein, RP/EB family, member 1          | 22919          | -0.017                              |
| MAPRE2      | microtubule-associated protein, RP/EB family, member 2          | 10982          | -0.039                              |
| MAT2A       | methionine adenosyltransferase II, alpha                        | 4144           | -0.024                              |
| MATK        | megakaryocyte-associated tyrosine kinase                        | 4145           | -0.026                              |
| MBNL1       | muscleblind-like splicing regulator 1                           | 4154           | -0.049                              |
| MCAM        | melanoma cell adhesion molecule                                 | 4162           | -0.033                              |
| MCM10       | minichromosome maintenance complex component 10                 | 55388          | -0.040                              |
| MCM3        | minichromosome maintenance complex component 3                  | 4172           | -0.063                              |
| MCM4        | minichromosome maintenance complex component 4                  | 4173           | -0.052                              |
| MCM5        | minichromosome maintenance complex component 5                  | 4174           | -0.062                              |
| MCM6        | minichromosome maintenance complex component 6                  | 4175           | -0.078                              |
| MCM8        | minichromosome maintenance complex component 8                  | 84515          | -0.057                              |
| MDC1        | mediator of DNA-damage checkpoint 1                             | 9656           | -0.039                              |
| MDF1        | MyoD family inhibitor                                           | 4188           | -0.031                              |
| MDH1        | malate dehydrogenase 1, NAD (soluble)                           | 4190           | -0.036                              |
| MDN1        | MDN1, midasin homolog (yeast)                                   | 23195          | -0.037                              |
| MECP2       | methyl CpG binding protein 2 (Rett syndrome)                    | 4204           | -0.022                              |
| MED1        | mediator complex subunit 1                                      | 5469           | -0.048                              |
| MED17       | mediator complex subunit 17                                     | 9440           | -0.053                              |
| MED21       | mediator complex subunit 21                                     | 9412           | -0.047                              |
| MED4        | mediator complex subunit 4                                      | 29079          | -0.068                              |
| MEIS1       | Meis homeobox 1                                                 | 4211           | -0.052                              |
| MELK        | maternal embryonic leucine zipper kinase                        | 9833           | -0.102                              |

Table S4 continues on the following page

**Table S4** (continued)—Cancer-associated network genes.

| Gene Symbol | Gene Name                                                                                                                                | Entrez Gene ID | Log <sub>2</sub> [postCPAP/preCPAP] |
|-------------|------------------------------------------------------------------------------------------------------------------------------------------|----------------|-------------------------------------|
| MET         | met proto-oncogene (hepatocyte growth factor receptor)                                                                                   | 4233           | -0.029                              |
| METAP1      | methionyl aminopeptidase 1                                                                                                               | 23173          | -0.035                              |
| METTL9      | methyltransferase like 9                                                                                                                 | 51108          | -0.036                              |
| MFGE8       | milk fat globule-EGF factor 8 protein                                                                                                    | 4240           | -0.042                              |
| MGA         | MGA, MAX dimerization protein                                                                                                            | 23269          | -0.057                              |
| MID1        | midline 1 (Opitz/BBB syndrome)                                                                                                           | 4281           | -0.048                              |
| MKL2        | MKL/myocardin-like 2                                                                                                                     | 57496          | -0.044                              |
| MLLT3       | myeloid/lymphoid or mixed-lineage leukemia (trithorax homolog, Drosophila); translocated to, 3                                           | 4300           | -0.090                              |
| MMD         | monocyte to macrophage differentiation-associated                                                                                        | 23531          | -0.122                              |
| MMP16       | matrix metalloproteinase 16 (membrane-inserted)                                                                                          | 4325           | -0.116                              |
| MOB4        | MOB family member 4, phocein                                                                                                             | 25843          | -0.039                              |
| MPDZ        | multiple PDZ domain protein                                                                                                              | 8777           | -0.054                              |
| MPHOSPH6    | M-phase phosphoprotein 6                                                                                                                 | 10200          | -0.058                              |
| MPHOSPH9    | M-phase phosphoprotein 9                                                                                                                 | 10198          | -0.044                              |
| MPP5        | membrane protein, palmitoylated 5 (MAGUK p55 subfamily member 5)                                                                         | 64398          | -0.022                              |
| MRE11A      | MRE11 meiotic recombination 11 homolog A (S. cerevisiae)                                                                                 | 4361           | -0.058                              |
| MRPL42      | mitochondrial ribosomal protein L42                                                                                                      | 28977          | -0.040                              |
| MRPL9       | mitochondrial ribosomal protein L9                                                                                                       | 65005          | -0.035                              |
| MSH6        | mutS homolog 6 (E. coli)                                                                                                                 | 2956           | -0.036                              |
| MST4        | serine/threonine protein kinase MST4                                                                                                     | 51765          | -0.052                              |
| MT1E        | metallothionein 1E                                                                                                                       | 4493           | -0.030                              |
| MT1H        | metallothionein 1H                                                                                                                       | 4496           | -0.067                              |
| MT2A        | metallothionein 2A                                                                                                                       | 4502           | -0.098                              |
| MTDH        | metadherin                                                                                                                               | 92140          | -0.016                              |
| MTHFD1      | methylenetetrahydrofolate dehydrogenase (NADP+ dependent) 1, methylenetetrahydrofolate cyclohydrolase, formyltetrahydrofolate synthetase | 4522           | -0.029                              |
| MYBL1       | v-myb myeloblastosis viral oncogene homolog (avian)-like 1                                                                               | 4603           | -0.105                              |
| MYBL2       | v-myb myeloblastosis viral oncogene homolog (avian)-like 2                                                                               | 4605           | -0.030                              |
| MYC         | v-myc myelocytomatosis viral oncogene homolog (avian)                                                                                    | 4609           | -0.084                              |
| MYCBP2      | MYC binding protein 2, E3 ubiquitin protein ligase                                                                                       | 23077          | -0.029                              |
| MYO9A       | myosin IXA                                                                                                                               | 4649           | -0.045                              |
| NAP1L1      | nucleosome assembly protein 1-like 1                                                                                                     | 4673           | -0.058                              |
| NBEA        | neurobeachin                                                                                                                             | 26960          | -0.029                              |
| NCAPD2      | non-SMC condensin I complex, subunit D2                                                                                                  | 9918           | -0.034                              |
| NCAPD3      | non-SMC condensin II complex, subunit D3                                                                                                 | 23310          | -0.061                              |
| NCAPG       | non-SMC condensin I complex, subunit G                                                                                                   | 64151          | -0.050                              |
| NCK1        | NCK adaptor protein 1                                                                                                                    | 4690           | -0.026                              |
| NCKAP1      | NCK-associated protein 1                                                                                                                 | 10787          | -0.099                              |
| NCL         | nucleolin                                                                                                                                | 4691           | -0.024                              |
| NCOA6       | nuclear receptor coactivator 6                                                                                                           | 23054          | -0.023                              |
| NCOR1       | nuclear receptor corepressor 1                                                                                                           | 9611           | -0.017                              |
| NDUFS4      | NADH dehydrogenase (ubiquinone) Fe-S protein 4, 18kDa (NADH-coenzyme Q reductase)                                                        | 4724           | -0.067                              |
| NEK1        | NIMA-related kinase 1                                                                                                                    | 4750           | -0.028                              |
| NEK7        | NIMA-related kinase 7                                                                                                                    | 140609         | -0.036                              |

Table S4 continues on the following page

**Table S4** (continued)—Cancer-associated network genes.

| Gene Symbol | Gene Name                                                                                            | Entrez Gene ID | Log <sub>2</sub> [postCPAP/preCPAP] |
|-------------|------------------------------------------------------------------------------------------------------|----------------|-------------------------------------|
| NF1         | neurofibromin 1                                                                                      | 4763           | -0.022                              |
| NF2         | neurofibromin 2 (merlin)                                                                             | 4771           | -0.021                              |
| NFATC3      | nuclear factor of activated T-cells, cytoplasmic, calcineurin-dependent 3                            | 4775           | -0.025                              |
| NFIA        | nuclear factor I/A                                                                                   | 4774           | -0.079                              |
| NFYB        | nuclear transcription factor Y, beta                                                                 | 4801           | -0.102                              |
| NMT2        | N-myristoyltransferase 2                                                                             | 9397           | -0.073                              |
| NNT         | nicotinamide nucleotide transhydrogenase                                                             | 23530          | -0.023                              |
| NONO        | non-POU domain containing, octamer-binding                                                           | 4841           | -0.012                              |
| NPAT        | nuclear protein, ataxia-telangiectasia locus                                                         | 4863           | -0.031                              |
| NQO1        | NAD(P)H dehydrogenase, quinone 1                                                                     | 1728           | -0.06                               |
| NR1D2       | nuclear receptor subfamily 1, group D, member 2                                                      | 9975           | -0.04                               |
| NR2C1       | nuclear receptor subfamily 2, group C, member 1                                                      | 7181           | -0.023                              |
| NR3C2       | nuclear receptor subfamily 3, group C, member 2                                                      | 4306           | -0.030                              |
| NRGN        | neurogranin (protein kinase C substrate, RC3)                                                        | 4900           | -0.076                              |
| NSFL1C      | NSFL1 (p97) cofactor (p47)                                                                           | 55968          | -0.050                              |
| NSMCE4A     | non-SMC element 4 homolog A ( <i>S. cerevisiae</i> )                                                 | 54780          | -0.013                              |
| NUDT21      | nudix (nucleoside diphosphate linked moiety X)-type motif 21                                         | 11051          | -0.037                              |
| NUP107      | nucleoporin 107kDa                                                                                   | 57122          | -0.019                              |
| NUP155      | nucleoporin 155kDa                                                                                   | 9631           | -0.034                              |
| NUP85       | nucleoporin 85kDa                                                                                    | 79902          | -0.042                              |
| NVL         | nuclear VCP-like                                                                                     | 4931           | -0.061                              |
| ODC1        | ornithine decarboxylase 1                                                                            | 4953           | -0.091                              |
| OGT         | O-linked N-acetylglucosamine (GlcNAc) transferase                                                    | 8473           | -0.026                              |
| OPTN        | optineurin                                                                                           | 10133          | -0.051                              |
| ORC4        | origin recognition complex, subunit 4                                                                | 5000           | -0.027                              |
| ORC6        | origin recognition complex, subunit 6                                                                | 23594          | -0.073                              |
| OSBPL3      | oxysterol binding protein-like 3                                                                     | 26031          | -0.065                              |
| OVOS/OVOS2  | ovostatin 2                                                                                          | 144203         | -0.037                              |
| OXCT1       | 3-oxoacid CoA transferase 1                                                                          | 5019           | -0.062                              |
| P4HA1       | prolyl 4-hydroxylase, alpha polypeptide I                                                            | 5033           | -0.032                              |
| PAFAH1B1    | platelet-activating factor acetylhydrolase 1b, regulatory subunit 1 (45kDa)                          | 5048           | -0.025                              |
| PAICS       | phosphoribosylaminoimidazole carboxylase, phosphoribosylaminoimidazole succinocarboxamide synthetase | 10606          | -0.043                              |
| PALB2       | partner and localizer of BRCA2                                                                       | 79728          | -0.026                              |
| PARP1       | poly (ADP-ribose) polymerase 1                                                                       | 142            | -0.031                              |
| PAXIP1      | PAX interacting (with transcription-activation domain) protein 1                                     | 22976          | -0.031                              |
| PBK         | PDZ binding kinase                                                                                   | 55872          | -0.104                              |
| PBX1        | pre-B-cell leukemia homeobox 1                                                                       | 5087           | -0.041                              |
| PCM1        | pericentriolar material 1                                                                            | 5108           | -0.034                              |
| PCNP        | PEST proteolytic signal containing nuclear protein                                                   | 57092          | -0.040                              |
| PDCD4       | programmed cell death 4 (neoplastic transformation inhibitor)                                        | 27250          | -0.024                              |
| PDE4B       | phosphodiesterase 4B, cAMP-specific                                                                  | 5142           | -0.033                              |
| PDLIM1      | PDZ and LIM domain 1                                                                                 | 9124           | -0.085                              |
| PDS5A       | PDS5, regulator of cohesion maintenance, homolog A ( <i>S. cerevisiae</i> )                          | 23244          | -0.050                              |

Table S4 continues on the following page

**Table S4** (continued)—Cancer-associated network genes.

| Gene Symbol | Gene Name                                                                                    | Entrez Gene ID | Log <sub>2</sub> [postCPAP/preCPAP] |
|-------------|----------------------------------------------------------------------------------------------|----------------|-------------------------------------|
| PEX7        | peroxisomal biogenesis factor 7                                                              | 5191           | -0.046                              |
| PF4         | platelet factor 4                                                                            | 5196           | -0.156                              |
| PFDN4       | prefoldin subunit 4                                                                          | 5203           | -0.062                              |
| PFKP        | phosphofructokinase, platelet                                                                | 5214           | -0.039                              |
| PFN2        | profilin 2                                                                                   | 5217           | -0.055                              |
| PGRMC1      | progesterone receptor membrane component 1                                                   | 10857          | -0.137                              |
| PGRMC2      | progesterone receptor membrane component 2                                                   | 10424          | -0.026                              |
| PHB2        | prohibitin 2                                                                                 | 11331          | -0.035                              |
| PHF17       | PHD finger protein 17                                                                        | 79960          | -0.018                              |
| PHF20L1     | PHD finger protein 20-like 1                                                                 | 51105          | -0.042                              |
| PHF6        | PHD finger protein 6                                                                         | 84295          | -0.025                              |
| PIK3C2A     | phosphatidylinositol-4-phosphate 3-kinase, catalytic subunit type 2 alpha                    | 5286           | -0.025                              |
| PIK3R1      | phosphoinositide-3-kinase, regulatory subunit 1 (alpha)                                      | 5295           | -0.073                              |
| PIK3R3      | phosphoinositide-3-kinase, regulatory subunit 3 (gamma)                                      | 8503           | -0.029                              |
| PKP4        | plakophilin 4                                                                                | 8502           | -0.024                              |
| PLCB1       | phospholipase C, beta 1 (phosphoinositide-specific)                                          | 23236          | -0.059                              |
| PLEKHA1     | pleckstrin homology domain containing, family A (phosphoinositide binding specific) member 1 | 59338          | -0.058                              |
| PLK4        | polo-like kinase 4                                                                           | 10733          | -0.071                              |
| PLS3        | plastin 3                                                                                    | 5358           | -0.061                              |
| PNP         | purine nucleoside phosphorylase                                                              | 4860           | -0.054                              |
| POLD3       | polymerase (DNA-directed), delta 3, accessory subunit                                        | 10714          | -0.028                              |
| POLR2B      | polymerase (RNA) II (DNA directed) polypeptide B, 140kDa                                     | 5431           | -0.032                              |
| POLR2G      | polymerase (RNA) II (DNA directed) polypeptide G                                             | 5436           | -0.052                              |
| POLR3B      | polymerase (RNA) III (DNA directed) polypeptide B                                            | 55703          | -0.025                              |
| POLR3H      | polymerase (RNA) III (DNA directed) polypeptide H (22.9kD)                                   | 171568         | -0.095                              |
| POT1        | protection of telomeres 1                                                                    | 25913          | -0.044                              |
| PPAT        | phosphoribosyl pyrophosphate amidotransferase                                                | 5471           | -0.042                              |
| PPBP        | pro-platelet basic protein (chemokine (C-X-C motif) ligand 7)                                | 5473           | -0.128                              |
| PPID        | peptidylprolyl isomerase D                                                                   | 5481           | -0.103                              |
| PPP1CC      | protein phosphatase 1, catalytic subunit, gamma isozyme                                      | 5501           | -0.036                              |
| PPP1R16B    | protein phosphatase 1, regulatory subunit 16B                                                | 26051          | -0.075                              |
| PRF1        | perforin 1 (pore forming protein)                                                            | 5551           | -0.127                              |
| PRIM1       | primase, DNA, polypeptide 1 (49kDa)                                                          | 5557           | -0.055                              |
| PRKAB2      | protein kinase, AMP-activated, beta 2 non-catalytic subunit                                  | 5565           | -0.042                              |
| PRKACB      | protein kinase, cAMP-dependent, catalytic, beta                                              | 5567           | -0.086                              |
| PRKAR1A     | protein kinase, cAMP-dependent, regulatory, type I, alpha                                    | 5573           | -0.017                              |
| PRKAR1B     | protein kinase, cAMP-dependent, regulatory, type I, beta                                     | 5575           | -0.041                              |
| PRKAR2A     | protein kinase, cAMP-dependent, regulatory, type II, alpha                                   | 5576           | -0.050                              |
| PRKAR2B     | protein kinase, cAMP-dependent, regulatory, type II, beta                                    | 5577           | -0.136                              |
| PRKCB       | protein kinase C, beta                                                                       | 5579           | -0.013                              |
| PRKCQ       | protein kinase C, theta                                                                      | 5588           | -0.071                              |
| PRKD3       | protein kinase D3                                                                            | 23683          | -0.008                              |
| PRKDC       | protein kinase, DNA-activated, catalytic polypeptide                                         | 5591           | -0.055                              |

Table S4 continues on the following page

**Table S4** (continued)—Cancer-associated network genes.

| Gene Symbol | Gene Name                                                                    | Entrez Gene ID | Log <sub>2</sub> [postCPAP/preCPAP] |
|-------------|------------------------------------------------------------------------------|----------------|-------------------------------------|
| PRKRA       | protein kinase, interferon-inducible double stranded RNA dependent activator | 8575           | -0.017                              |
| PRPF38B     | PRP38 pre-mRNA processing factor 38 (yeast) domain containing B              | 55119          | -0.036                              |
| PRPF4B      | PRP4 pre-mRNA processing factor 4 homolog B (yeast)                          | 8899           | -0.018                              |
| PRPF8       | PRP8 pre-mRNA processing factor 8 homolog ( <i>S. cerevisiae</i> )           | 10594          | -0.044                              |
| PRPS1       | phosphoribosyl pyrophosphate synthetase 1                                    | 5631           | -0.057                              |
| PRR14L      | proline rich 14-like                                                         | 253143         | -0.013                              |
| PRSS23      | protease, serine, 23                                                         | 11098          | -0.044                              |
| PSIP1       | PC4 and SFRS1 interacting protein 1                                          | 11168          | -0.116                              |
| PSMD14      | proteasome (prosome, macropain) 26S subunit, non-ATPase, 14                  | 10213          | -0.062                              |
| PSMD2       | proteasome (prosome, macropain) 26S subunit, non-ATPase, 2                   | 5708           | -0.059                              |
| PSMG2       | proteasome (prosome, macropain) assembly chaperone 2                         | 56984          | -0.019                              |
| PTBP3       | polypyrimidine tract binding protein 3                                       | 9991           | -0.023                              |
| PTCH1       | patched 1                                                                    | 5727           | -0.069                              |
| PTMA        | prothymosin, alpha                                                           | 5757           | -0.041                              |
| PTPN14      | protein tyrosine phosphatase, non-receptor type 14                           | 5784           | -0.030                              |
| PTPN22      | protein tyrosine phosphatase, non-receptor type 22 (lymphoid)                | 26191          | -0.032                              |
| PTPN3       | protein tyrosine phosphatase, non-receptor type 3                            | 5774           | -0.047                              |
| PUM2        | pumilio homolog 2 ( <i>Drosophila</i> )                                      | 23369          | -0.016                              |
| PURB        | purine-rich element binding protein B                                        | 5814           | -0.014                              |
| RAB11A      | RAB11A, member RAS oncogene family                                           | 8766           | -0.064                              |
| RAB1A       | RAB1A, member RAS oncogene family                                            | 5861           | -0.021                              |
| RAB22A      | RAB22A, member RAS oncogene family                                           | 57403          | -0.019                              |
| RAB40B      | RAB40B, member RAS oncogene family                                           | 10966          | -0.020                              |
| RAB7A       | RAB7A, member RAS oncogene family                                            | 7879           | -0.100                              |
| RACGAP1     | Rac GTPase activating protein 1                                              | 29127          | -0.067                              |
| RAD50       | RAD50 homolog ( <i>S. cerevisiae</i> )                                       | 10111          | -0.036                              |
| RAD51       | RAD51 homolog ( <i>S. cerevisiae</i> )                                       | 5888           | -0.052                              |
| RAD54L      | RAD54-like ( <i>S. cerevisiae</i> )                                          | 8438           | -0.044                              |
| RAE1        | RAE1 RNA export 1 homolog ( <i>S. pombe</i> )                                | 8480           | -0.026                              |
| RAG1        | recombination activating gene 1                                              | 5896           | -0.029                              |
| RAG2        | recombination activating gene 2                                              | 5897           | -0.058                              |
| RAP2A       | RAP2A, member of RAS oncogene family                                         | 5911           | -0.066                              |
| RASGRP1     | RAS guanyl releasing protein 1 (calcium and DAG-regulated)                   | 10125          | -0.052                              |
| RBM15       | RNA binding motif protein 15                                                 | 64783          | -0.023                              |
| RBM34       | RNA binding motif protein 34                                                 | 23029          | -0.023                              |
| RBMX        | RNA binding motif protein, X-linked                                          | 27316          | -0.032                              |
| RBPJ        | recombination signal binding protein for immunoglobulin kappa J region       | 3516           | -0.035                              |
| RDX         | radixin                                                                      | 5962           | -0.052                              |
| RFC1        | replication factor C (activator 1) 1, 145kDa                                 | 5981           | -0.022                              |
| RFC4        | replication factor C (activator 1) 4, 37kDa                                  | 5984           | -0.073                              |
| RFWD3       | ring finger and WD repeat domain 3                                           | 55159          | -0.071                              |
| RFX3        | regulatory factor X, 3 (influences HLA class II expression)                  | 5991           | -0.062                              |
| RGCC        | regulator of cell cycle                                                      | 28984          | -0.053                              |

Table S4 continues on the following page

**Table S4** (continued)—Cancer-associated network genes.

| Gene Symbol | Gene Name                                                                                     | Entrez Gene ID | Log <sub>2</sub> [postCPAP/preCPAP] |
|-------------|-----------------------------------------------------------------------------------------------|----------------|-------------------------------------|
| RHOBTB3     | Rho-related BTB domain containing 3                                                           | 22836          | -0.092                              |
| RIF1        | RAP1 interacting factor homolog (yeast)                                                       | 55183          | -0.034                              |
| RIOK3       | RIO kinase 3                                                                                  | 8780           | -0.067                              |
| RLIM        | ring finger protein, LIM domain interacting                                                   | 51132          | -0.081                              |
| RMND5A      | required for meiotic nuclear division 5 homolog A ( <i>S. cerevisiae</i> )                    | 64795          | -0.037                              |
| RNASEH2B    | ribonuclease H2, subunit B                                                                    | 79621          | -0.034                              |
| RNF14       | ring finger protein 14                                                                        | 9604           | -0.046                              |
| RNF19A      | ring finger protein 19A, E3 ubiquitin protein ligase                                          | 25897          | -0.042                              |
| RNF6        | ring finger protein (C3H2C3 type) 6                                                           | 6049           | -0.03                               |
| RNF7        | ring finger protein 7                                                                         | 9616           | -0.022                              |
| RNMT        | RNA (guanine-7-) methyltransferase                                                            | 8731           | -0.030                              |
| RORA        | RAR-related orphan receptor A                                                                 | 6095           | -0.091                              |
| RPL15       | ribosomal protein L15                                                                         | 6138           | -0.054                              |
| RPN2        | ribophorin II                                                                                 | 6185           | -0.030                              |
| RPP30       | ribonuclease P/MRP 30kDa subunit                                                              | 10556          | -0.032                              |
| RRM1        | ribonucleotide reductase M1                                                                   | 6240           | -0.029                              |
| RRM2        | ribonucleotide reductase M2                                                                   | 6241           | -0.113                              |
| RRN3        | RRN3 RNA polymerase I transcription factor homolog ( <i>S. cerevisiae</i> )                   | 54700          | -0.088                              |
| RSF1        | remodeling and spacing factor 1                                                               | 51773          | -0.018                              |
| RTCA        | RNA 3'-terminal phosphate cyclase                                                             | 8634           | -0.026                              |
| RTF1        | Rtf1, Paf1/RNA polymerase II complex component, homolog ( <i>S. cerevisiae</i> )              | 23168          | -0.048                              |
| RWDD3       | RWD domain containing 3                                                                       | 25950          | -0.020                              |
| RYK         | receptor-like tyrosine kinase                                                                 | 6259           | -0.040                              |
| SCAMP1      | secretory carrier membrane protein 1                                                          | 9522           | -0.045                              |
| SCAPER      | S-phase cyclin A-associated protein in the ER                                                 | 49855          | -0.027                              |
| SEC23A      | Sec23 homolog A ( <i>S. cerevisiae</i> )                                                      | 10484          | -0.046                              |
| SEC23IP     | SEC23 interacting protein                                                                     | 11196          | -0.011                              |
| SERINC3     | serine incorporator 3                                                                         | 10955          | -0.022                              |
| SERPINE2    | serpin peptidase inhibitor, clade E (nexin, plasminogen activator inhibitor type 1), member 2 | 5270           | -0.061                              |
| SERTAD4     | SERTA domain containing 4                                                                     | 56256          | -0.039                              |
| SFPQ        | splicing factor proline/glutamine-rich                                                        | 6421           | -0.030                              |
| SGOL2       | shugoshin-like 2 ( <i>S. pombe</i> )                                                          | 151246         | -0.115                              |
| SH2D1A      | SH2 domain containing 1A                                                                      | 4068           | -0.057                              |
| SH3BP4      | SH3-domain binding protein 4                                                                  | 23677          | -0.054                              |
| SH3BP5      | SH3-domain binding protein 5 (BTK-associated)                                                 | 9467           | -0.028                              |
| SHFM1       | split hand/foot malformation (ectrodactyly) type 1                                            | 7979           | -0.028                              |
| SKP1        | S-phase kinase-associated protein 1                                                           | 6500           | -0.041                              |
| SKP2        | S-phase kinase-associated protein 2, E3 ubiquitin protein ligase                              | 6502           | -0.073                              |
| SLC16A1     | solute carrier family 16, member 1 (monocarboxylic acid transporter 1)                        | 6566           | -0.098                              |
| SLC25A12    | solute carrier family 25 (aspartate/glutamate carrier), member 12                             | 8604           | -0.051                              |
| SLC26A2     | solute carrier family 26 (sulfate transporter), member 2                                      | 1836           | -0.043                              |
| SLC30A5     | solute carrier family 30 (zinc transporter), member 5                                         | 64924          | -0.021                              |
| SLC38A1     | solute carrier family 38, member 1                                                            | 81539          | -0.046                              |

Table S4 continues on the following page



**Table S4** (continued)—Cancer-associated network genes.

| Gene Symbol | Gene Name                                                                                         | Entrez Gene ID | Log <sub>2</sub> [postCPAP/preCPAP] |
|-------------|---------------------------------------------------------------------------------------------------|----------------|-------------------------------------|
| SLC38A2     | solute carrier family 38, member 2                                                                | 54407          | -0.052                              |
| SLC5A3      | solute carrier family 5 (sodium/myo-inositol cotransporter), member 3                             | 6526           | -0.111                              |
| SLTM        | SAFB-like, transcription modulator                                                                | 79811          | -0.017                              |
| SMAD2       | SMAD family member 2                                                                              | 4087           | -0.036                              |
| SMAD3       | SMAD family member 3                                                                              | 4088           | -0.035                              |
| SMAD4       | SMAD family member 4                                                                              | 4089           | -0.032                              |
| SMARCA2     | SWI/SNF related, matrix associated, actin dependent regulator of chromatin, subfamily a, member 2 | 6595           | -0.020                              |
| SMARCA5     | SWI/SNF related, matrix associated, actin dependent regulator of chromatin, subfamily a, member 5 | 8467           | -0.045                              |
| SMC1A       | structural maintenance of chromosomes 1A                                                          | 8243           | -0.042                              |
| SMC2        | structural maintenance of chromosomes 2                                                           | 10592          | -0.050                              |
| SMC3        | structural maintenance of chromosomes 3                                                           | 9126           | -0.043                              |
| SMC4        | structural maintenance of chromosomes 4                                                           | 10051          | -0.055                              |
| SMCHD1      | structural maintenance of chromosomes flexible hinge domain containing 1                          | 23347          | -0.028                              |
| SMS         | spermine synthase                                                                                 | 6611           | -0.027                              |
| SNRNP27     | small nuclear ribonucleoprotein 27kDa (U4/U6.U5)                                                  | 11017          | -0.032                              |
| SNRNP40     | small nuclear ribonucleoprotein 40kDa (U5)                                                        | 9410           | -0.047                              |
| SNRPA       | small nuclear ribonucleoprotein polypeptide A                                                     | 6626           | -0.042                              |
| SNRPB       | small nuclear ribonucleoprotein polypeptides B and B1                                             | 6628           | -0.065                              |
| SNRPN       | small nuclear ribonucleoprotein polypeptide N                                                     | 6638           | -0.041                              |
| SNX5        | sorting nexin 5                                                                                   | 27131          | -0.044                              |
| SPIN1       | spindlin 1                                                                                        | 10927          | -0.027                              |
| SPTBN1      | spectrin, beta, non-erythrocytic 1                                                                | 6711           | -0.067                              |
| SRSF1       | serine/arginine-rich splicing factor 1                                                            | 6426           | -0.013                              |
| SRSF11      | serine/arginine-rich splicing factor 11                                                           | 9295           | -0.028                              |
| SRSF2       | serine/arginine-rich splicing factor 2                                                            | 6427           | -0.026                              |
| SRSF3       | serine/arginine-rich splicing factor 3                                                            | 6428           | -0.045                              |
| SS18        | synovial sarcoma translocation, chromosome 18                                                     | 6760           | -0.061                              |
| SSBP2       | single-stranded DNA binding protein 2                                                             | 23635          | -0.035                              |
| ST13        | suppression of tumorigenicity 13 (colon carcinoma) (Hsp70 interacting protein)                    | 6767           | -0.030                              |
| STAG1       | stromal antigen 1                                                                                 | 10274          | -0.021                              |
| STAM2       | signal transducing adaptor molecule (SH3 domain and ITAM motif) 2                                 | 10254          | -0.045                              |
| STAR        | steroidogenic acute regulatory protein                                                            | 6770           | -0.077                              |
| STAT4       | signal transducer and activator of transcription 4                                                | 6775           | -0.069                              |
| STAU2       | staufen, RNA binding protein, homolog 2 (Drosophila)                                              | 27067          | -0.024                              |
| STRBP       | spermatid perinuclear RNA binding protein                                                         | 55342          | -0.047                              |
| STXBP3      | syntaxin binding protein 3                                                                        | 6814           | -0.031                              |
| SUCLA2      | succinate-CoA ligase, ADP-forming, beta subunit                                                   | 8803           | -0.048                              |
| SUCLG1      | succinate-CoA ligase, alpha subunit                                                               | 8802           | -0.015                              |
| SUCLG2      | succinate-CoA ligase, GDP-forming, beta subunit                                                   | 8801           | -0.129                              |
| SYCP2       | synaptonemal complex protein 2                                                                    | 10388          | -0.047                              |
| SYNCRIP     | synaptotagmin binding, cytoplasmic RNA interacting protein                                        | 10492          | -0.051                              |
| SYNE1       | spectrin repeat containing, nuclear envelope 1                                                    | 23345          | -0.044                              |

Table S4 continues on the following page

**Table S4** (continued)—Cancer-associated network genes.

| Gene Symbol | Gene Name                                                                        | Entrez Gene ID | Log <sub>2</sub> [postCPAP/preCPAP] |
|-------------|----------------------------------------------------------------------------------|----------------|-------------------------------------|
| SYNE2       | spectrin repeat containing, nuclear envelope 2                                   | 23224          | -0.057                              |
| SYT11       | synaptotagmin XI                                                                 | 23208          | -0.047                              |
| SYTL2       | synaptotagmin-like 2                                                             | 54843          | -0.024                              |
| TACC1       | transforming, acidic coiled-coil containing protein 1                            | 6867           | -0.019                              |
| TAF1        | TAF1 RNA polymerase II, TATA box binding protein (TBP)-associated factor, 250kDa | 6872           | -0.018                              |
| TAF1D       | TATA box binding protein (TBP)-associated factor, RNA polymerase I, D, 41kDa     | 79101          | -0.025                              |
| TAF9B       | TAF9B RNA polymerase II, TATA box binding protein (TBP)-associated factor, 31kDa | 51616          | -0.039                              |
| TANK        | TRAF family member-associated NFKB activator                                     | 10010          | -0.048                              |
| TARP        | TCR gamma alternate reading frame protein                                        | 445347         | -0.063                              |
| TASP1       | taspase, threonine aspartase, 1                                                  | 55617          | -0.028                              |
| TBC1D4      | TBC1 domain family, member 4                                                     | 9882           | -0.030                              |
| TBCA        | tubulin folding cofactor A                                                       | 6902           | -0.017                              |
| TBL1XR1     | transducin (beta)-like 1 X-linked receptor 1                                     | 79718          | -0.056                              |
| TCEA1       | transcription elongation factor A (SII), 1                                       | 6917           | -0.027                              |
| TCN2        | transcobalamin II                                                                | 6948           | -0.029                              |
| TCP1        | t-complex 1                                                                      | 6950           | -0.026                              |
| TDP2        | tyrosyl-DNA phosphodiesterase 2                                                  | 51567          | -0.046                              |
| TERF2       | telomeric repeat binding factor 2                                                | 7014           | -0.024                              |
| TFCP2       | transcription factor CP2                                                         | 7024           | -0.021                              |
| TFDP2       | transcription factor Dp-2 (E2F dimerization partner 2)                           | 7029           | -0.049                              |
| TGFA        | transforming growth factor, alpha                                                | 7039           | -0.039                              |
| TGFB2       | transforming growth factor, beta 2                                               | 7042           | -0.054                              |
| TGFBR3      | transforming growth factor, beta receptor III                                    | 7049           | -0.099                              |
| THAP11      | THAP domain containing 11                                                        | 57215          | -0.054                              |
| THBS1       | thrombospondin 1                                                                 | 7057           | -0.070                              |
| THOC1       | THO complex 1                                                                    | 9984           | -0.04                               |
| THOC2       | THO complex 2                                                                    | 57187          | -0.024                              |
| THUMPD1     | THUMP domain containing 1                                                        | 55623          | -0.025                              |
| TIA1        | TIA1 cytotoxic granule-associated RNA binding protein                            | 7072           | -0.036                              |
| TIAL1       | TIA1 cytotoxic granule-associated RNA binding protein-like 1                     | 7073           | -0.023                              |
| TIMELESS    | timeless circadian clock                                                         | 8914           | -0.045                              |
| TIMM17A     | translocase of inner mitochondrial membrane 17 homolog A (yeast)                 | 10440          | -0.043                              |
| TIPIN       | TIMELESS interacting protein                                                     | 54962          | -0.027                              |
| TLK1        | tousled-like kinase 1                                                            | 9874           | -0.068                              |
| TLK2        | tousled-like kinase 2                                                            | 11011          | -0.016                              |
| TMED10      | transmembrane emp24-like trafficking protein 10 (yeast)                          | 10972          | -0.017                              |
| TMED7       | transmembrane emp24 protein transport domain containing 7                        | 51014          | -0.018                              |
| TMEM2       | transmembrane protein 2                                                          | 23670          | -0.043                              |
| TMEM48      | transmembrane protein 48                                                         | 55706          | -0.036                              |
| TMF1        | TATA element modulatory factor 1                                                 | 7110           | -0.025                              |
| TNIK        | TRAF2 and NCK interacting kinase                                                 | 23043          | -0.051                              |
| TNPO1       | transportin 1                                                                    | 3842           | -0.023                              |
| TOMM70A     | translocase of outer mitochondrial membrane 70 homolog A (S. cerevisiae)         | 9868           | -0.048                              |

Table S4 continues on the following page

**Table S4** (continued)—Cancer-associated network genes.

| Gene Symbol | Gene Name                                                          | Entrez Gene ID | Log <sub>2</sub> [postCPAP/preCPAP] |
|-------------|--------------------------------------------------------------------|----------------|-------------------------------------|
| TOP1        | topoisomerase (DNA) I                                              | 7150           | -0.033                              |
| TOP2A       | topoisomerase (DNA) II alpha 170kDa                                | 7153           | -0.062                              |
| TPX2        | TPX2, microtubule-associated, homolog ( <i>Xenopus laevis</i> )    | 22974          | -0.073                              |
| TRA         | T cell receptor alpha locus                                        | 6955           | -0.078                              |
| TRAF3IP3    | TRAF3 interacting protein 3                                        | 80342          | -0.026                              |
| TRAK2       | trafficking protein, kinesin binding 2                             | 66008          | -0.056                              |
| TRAPPC2     | trafficking protein particle complex 2                             | 6399           | -0.116                              |
| TRAPPC4     | trafficking protein particle complex 4                             | 51399          | -0.034                              |
| TRAT1       | T cell receptor associated transmembrane adaptor 1                 | 50852          | -0.101                              |
| TRIM2       | tripartite motif containing 2                                      | 23321          | -0.028                              |
| TRIM24      | tripartite motif containing 24                                     | 8805           | -0.038                              |
| TRIM37      | tripartite motif containing 37                                     | 4591           | -0.039                              |
| TRIP12      | thyroid hormone receptor interactor 12                             | 9320           | -0.016                              |
| TRIP4       | thyroid hormone receptor interactor 4                              | 9325           | -0.022                              |
| TRMT1L      | tRNA methyltransferase 1 homolog ( <i>S. cerevisiae</i> )-like     | 81627          | -0.038                              |
| TROVE2      | TROVE domain family, member 2                                      | 6738           | -0.041                              |
| TRPC1       | transient receptor potential cation channel, subfamily C, member 1 | 7220           | -0.098                              |
| TRPM7       | transient receptor potential cation channel, subfamily M, member 7 | 54822          | -0.047                              |
| TRRAP       | transformation/transcription domain-associated protein             | 8295           | -0.024                              |
| TRUB1       | TruB pseudouridine (psi) synthase homolog 1 ( <i>E. coli</i> )     | 142940         | -0.047                              |
| TSC22D3     | TSC22 domain family, member 3                                      | 1831           | -0.022                              |
| TSR1        | TSR1, 20S rRNA accumulation, homolog ( <i>S. cerevisiae</i> )      | 55720          | -0.055                              |
| TTC3        | tetratricopeptide repeat domain 3                                  | 7267           | -0.045                              |
| TTC37       | tetratricopeptide repeat domain 37                                 | 9652           | -0.043                              |
| TTI1        | TELO2 interacting protein 1                                        | 9675           | -0.062                              |
| TUBB4B      | tubulin, beta 4B class IVb                                         | 10383          | 0.019                               |
| TUBG1       | tubulin, gamma 1                                                   | 7283           | -0.059                              |
| TULP4       | tubby like protein 4                                               | 56995          | -0.054                              |
| TXK         | TXK tyrosine kinase                                                | 7294           | -0.086                              |
| TYMS        | thymidylate synthetase                                             | 7298           | 0.056                               |
| U2SURP      | U2 snRNP-associated SURP domain containing                         | 23350          | -0.035                              |
| UBE2C       | ubiquitin-conjugating enzyme E2C                                   | 11065          | -0.080                              |
| UBE2D2      | ubiquitin-conjugating enzyme E2D 2                                 | 7322           | -0.057                              |
| UBE2I       | ubiquitin-conjugating enzyme E2I                                   | 7329           | -0.027                              |
| UBE2K       | ubiquitin-conjugating enzyme E2K                                   | 3093           | -0.025                              |
| UBQLN2      | ubiquilin 2                                                        | 29978          | -0.019                              |
| UCHL5       | ubiquitin carboxyl-terminal hydrolase L5                           | 51377          | -0.026                              |
| UGDH        | UDP-glucose 6-dehydrogenase                                        | 7358           | -0.058                              |
| UGGT1       | UDP-glucose glycoprotein glucosyltransferase 1                     | 56886          | -0.035                              |
| UPF3B       | UPF3 regulator of nonsense transcripts homolog B (yeast)           | 65109          | -0.023                              |
| USO1        | USO1 vesicle transport factor                                      | 8615           | -0.073                              |
| USP34       | ubiquitin specific peptidase 34                                    | 9736           | -0.031                              |
| USP44       | ubiquitin specific peptidase 44                                    | 84101          | -0.097                              |

Table S4 continues on the following page

**Table S4** (continued)—Cancer-associated network genes.

| Gene Symbol | Gene Name                                                                                   | Entrez Gene ID | Log <sub>2</sub> [postCPAP/preCPAP] |
|-------------|---------------------------------------------------------------------------------------------|----------------|-------------------------------------|
| USP47       | ubiquitin specific peptidase 47                                                             | 55031          | -0.046                              |
| USP9X       | ubiquitin specific peptidase 9, X-linked                                                    | 8239           | -0.020                              |
| UTP15       | UTP15, U3 small nucleolar ribonucleoprotein, homolog (S. cerevisiae)                        | 84135          | -0.026                              |
| UTRN        | utrophin                                                                                    | 7402           | -0.033                              |
| UVRAG       | UV radiation resistance associated                                                          | 7405           | -0.026                              |
| VBP1        | von Hippel-Lindau binding protein 1                                                         | 7411           | -0.105                              |
| VDAC3       | voltage-dependent anion channel 3                                                           | 7419           | -0.086                              |
| VEGFA       | vascular endothelial growth factor A                                                        | 7422           | -0.053                              |
| VPS13A      | vacuolar protein sorting 13 homolog A (S. cerevisiae)                                       | 23230          | -0.048                              |
| VPS26A      | vacuolar protein sorting 26 homolog A (S. pombe)                                            | 9559           | -0.036                              |
| VPS45       | vacuolar protein sorting 45 homolog (S. cerevisiae)                                         | 11311          | -0.008                              |
| WAC         | WW domain containing adaptor with coiled-coil                                               | 51322          | -0.017                              |
| WBP11       | WW domain binding protein 11                                                                | 51729          | -0.024                              |
| WDR3        | WD repeat domain 3                                                                          | 10885          | -0.033                              |
| WDR75       | WD repeat domain 75                                                                         | 84128          | -0.040                              |
| WDR76       | WD repeat domain 76                                                                         | 79968          | -0.066                              |
| WHSC1       | Wolf-Hirschhorn syndrome candidate 1                                                        | 7468           | -0.081                              |
| WNK1        | WNK lysine deficient protein kinase 1                                                       | 65125          | -0.039                              |
| WRN         | Werner syndrome, RecQ helicase-like                                                         | 7486           | -0.072                              |
| XPA         | xeroderma pigmentosum, complementation group A                                              | 7507           | -0.051                              |
| XPO1        | exportin 1 (CRM1 homolog, yeast)                                                            | 7514           | -0.073                              |
| YES1        | v-yes-1 Yamaguchi sarcoma viral oncogene homolog 1                                          | 7525           | -0.05                               |
| YTHDC1      | YTH domain containing 1                                                                     | 91746          | -0.011                              |
| YTHDF1      | YTH domain family, member 1                                                                 | 54915          | -0.061                              |
| YWHAB       | tyrosine 3-monooxygenase/tryptophan 5-monooxygenase activation protein, beta polypeptide    | 7529           | -0.012                              |
| YWHAE       | tyrosine 3-monooxygenase/tryptophan 5-monooxygenase activation protein, epsilon polypeptide | 7531           | -0.025                              |
| ZAP70       | zeta-chain (TCR) associated protein kinase 70kDa                                            | 7535           | -0.067                              |
| ZBED1       | zinc finger, BED-type containing 1                                                          | 9189           | -0.026                              |
| ZBTB20      | zinc finger and BTB domain containing 20                                                    | 26137          | -0.029                              |
| ZBTB5       | zinc finger and BTB domain containing 5                                                     | 9925           | -0.035                              |
| ZC3H13      | zinc finger CCCH-type containing 13                                                         | 23091          | -0.032                              |
| ZCCHC10     | zinc finger, CCHC domain containing 10                                                      | 54819          | -0.095                              |
| ZMYND11     | zinc finger, MYND-type containing 11                                                        | 10771          | -0.040                              |
| ZNF22       | zinc finger protein 22                                                                      | 7570           | -0.063                              |
| ZNF318      | zinc finger protein 318                                                                     | 24149          | -0.043                              |
| ZNF667      | zinc finger protein 667                                                                     | 63934          | -0.067                              |
| ZRANB2      | zinc finger, RAN-binding domain containing 2                                                | 9406           | -0.035                              |
